# Supplementary material for: Urban Environments and Obesity in Southeast Asia: A Systematic Review, Meta-Analysis and Meta-Regression
Source: PLoS One. 2014 Nov 26;9(11):e113547. doi: 10.1371/journal.pone.0113547 (PMC4245122; doi:10.1371/journal.pone.0113547)
Supplement: Data S1 — Data extraction worksheet. (XLSX) [file pone.0113547.s003.xlsx]

## Sheet: cross sectional
Study ID	1	1	1	1	2	2	3	3	3	3	3	3	4	5	5	5	6	7	7	7	7	8	9	10	11	11	11	11	11	11	12	12	13	13	13	14	15	16	16	17	18	18	19	20	20	21	22	23	24
Author	Aekplakorn	Aekplakorn	Aekplakorn	Aekplakorn	Aekplakorn	Aekplakorn	Aekplakorn	Aekplakorn	Aekplakorn	Aekplakorn	Aekplakorn	Aekplakorn	Anuar Zaini	Azmi	Azmi	Azmi	Banwell	Dahly	Dahly	Dahly	Dahly	Firestone	Ha	Hanh	Jinam	Jinam	Jinam	Jinam	Jinam	Jinam	Jitarin	Jitarin	Julia	Julia	Julia	Jurgensen	Lierop	Ly	Ly	Mohamud	Ng	Ng	Nguyen	Ramke	Ramke	Rampal	Sakamoto	Sartika	Sumarni
Year of publication	2011	2011	2011	2011	2011	2011	2007	2007	2007	2007	2007	2007	2005	2009	2009	2009	2009	2010	2010	2010	2010	2011	2011	2001	2008	2008	2008	2008	2008	2008	2010	2010	2004	2004	2004	2009	2008	2013	2013	2012	2006	2006	2007	2012	2012	2007	2001	2011	2006
Year of fieldwork	2000	2000	2000	2000	2008	2008	2004 and 1997	2004 and 1997	2004 and 1997	2004 and 1997	2004 and 1997	2004 and 1997	not clearly stated	oct 2002-July 2003	oct 2002-July 2003	oct 2002-July 2003	2005	2005	2005	2005	2005	2004	2000 and 2005	1999	not stated	not stated	not stated	not stated	not stated	not stated	2004-2005	2004-2005	1999	1999	1999	2006	2005-2006	2010	2010	2006	2001	2001	1992-1993; 1997-1998; 2001-2002	2009-2010	2009-2010	2004	1997	not clearly stated	not clearly stated
country	Thailand	Thailand	Thailand	Thailand	thailand	thailand	Thailand	Thailand	Thailand	Thailand	Thailand	Thailand	Malaysia	malaysia	malaysia	malaysia	Thailand	Philippines	Philippines	Philippines	Philippines	Thailand	Vietnam	Vietnam	Malaysia	Malaysia	Malaysia	Malaysia	Malaysia	Malaysia	Thailand	Thailand	Indonesia	Indonesia	Indonesia	Laos	Vietnam	Vietnam	Vietnam	Malaysia	Indonesia	Indonesia	Vietnam	Timor Leste	Timor Leste	Malaysia	Thailand	Indonesia	Malaysia
study design	cross sectional	cross sectional	cross sectional	cross sectional	cross sectional survey	cross sectional survey	cross sectinal survey	cross sectinal survey	cross sectinal survey	cross sectinal survey	cross sectinal survey	cross sectinal survey	cross sectional	cross sectional	cross sectional	cross sectional	cross sectional	cross sectinal data using birth cohort	cross sectinal data using birth cohort	cross sectinal data using birth cohort	cross sectinal data using birth cohort	cross sectional survey	cross sectional survey	cross sectional survey	Cross section	Cross section	Cross section	Cross section	Cross section	Cross section	cross sectional	cross sectional	cross sectional	cross sectional	cross sectional	cross sectional	cross sectional	cross sectional	cross sectional	cross sectional	cross sectiona;	cross sectiona;	Multiple cross sectionals	cross sectional	cross sectional	cross sectional	cross sectional	cross sectional	cross sectional
Objective	urban-rural difference	urban-rural difference	urban-rural difference	urban-rural difference	urban rural differences	urban rural differences	urban rural differences	urban rural differences	urban rural differences	urban rural differences	urban rural differences	urban rural differences	urban rural differences	urban rural difference	urban rural difference	urban rural difference	urban rual differences	urban rural differences	urban rural differences	urban rural differences	urban rural differences	urban rural differences	urban rural differences	urban rural differences	urban rural comparison	urban rural comparison	urban rural comparison	urban rural comparison	urban rural comparison	urban rural comparison	urban rural comparison	urban rural comparison	rural to urban	rural to urban	rural to urban	urban rural differences	urban rural differences	urban rural differences	urban rural differences	urban rural differences	urban rural differnces	urban rural differnces	urban rural differences	urban rural differences	urban rural differences	urban rural differences	urban rural differences	urban rural differences	urban rural differences
population	National survey Thai ≥35	National survey Thai ≥35	National survey Thai ≥35	National survey Thai ≥35	Thai adults >20	Thai adults >20	Thai >15 years of age	Thai >15 years of age	Thai >15 years of age	Thai >15 years of age	Thai >15 years of age	Thai >15 years of age	children age 9-10	18-59	18-59	18-59	university students	communicty based study in metropolitan Cebu	communicty based study in metropolitan Cebu	communicty based study in metropolitan Cebu	communicty based study in metropolitan Cebu	Children from Kanchanburi Demograhpic survalence system	Nationally representative surveys	middle age adult in Ho Chi Minh city	Indiginous group: tamuan, jehai, kensiu and Bidayuh	Indiginous group: tamuan, jehai, kensiu and Bidayuh	Indiginous group: tamuan, jehai, kensiu and Bidayuh	Indiginous group: tamuan, jehai, kensiu and Bidayuh	Indiginous group: tamuan, jehai, kensiu and Bidayuh	Indiginous group: tamuan, jehai, kensiu and Bidayuh	Thai adults	Thai adults	prepubertal children in central Java (6-8 for girls, 6-9 for boys)	prepubertal children in central Java (6-8 for girls, 6-9 for boys)	prepubertal children in central Java (6-8 for girls, 6-9 for boys)	12 year old chidlren in Vientiane	primary school children 6-10	adult population in Danang (>35)	adult population in Danang (>35)	adults (age≥18)	Adulsts in Purworejo district, Jogjakarta province	Adulsts in Purworejo district, Jogjakarta province	adults in vietnam	adults in timor living in mainland districts	adults in timor living in mainland districts	adults age 15 and above	preschool children	adults 35-60 in Depok City	primary school chidren entering fifth grade in Kuala Selangor district
Representativeness of population	National survey, complex stratified multistage probability sampling design	National survey, complex stratified multistage probability sampling design	National survey, complex stratified multistage probability sampling design	National survey, complex stratified multistage probability sampling design	nationally representative, four-stage, stratified samplling	nationally representative, four-stage, stratified samplling	Nationally representative, multistage, stratified, cluseterd sampling	Nationally representative, multistage, stratified, cluseterd sampling	Nationally representative, multistage, stratified, cluseterd sampling	Nationally representative, multistage, stratified, cluseterd sampling	Nationally representative, multistage, stratified, cluseterd sampling	Nationally representative, multistage, stratified, cluseterd sampling	53/357 Schools in the state of Selangor were randomly selected, then children was randomly relected	Malaysian Adult Nutrition Survey, complex sampling, representativeness not clearly stated	Malaysian Adult Nutrition Survey, complex sampling, representativeness not clearly stated	Malaysian Adult Nutrition Survey, complex sampling, representativeness not clearly stated	the cohort is similar to the Thai population in its geographical distribution and sociodemographic features, it represents a younger, more urban and educated group	Single stage cluster sampling of community in cebu, birth cohort design	Single stage cluster sampling of community in cebu, birth cohort design	Single stage cluster sampling of community in cebu, birth cohort design	Single stage cluster sampling of community in cebu, birth cohort design	Survalence system used to monitor demographic and health trends using two stage sampling design form Kanchanburi province	2000 from National Nutrirional Suvey; 2005 from National Adult Obesity survey. Both are stratifed two stage sampling design	100 subjects randomly selected from especific urban, suburban and rural area of the city	Tamuan from Kuala Pilah andJelebu, Jehai and Kensiu from Grink and Baling,Bidayuh from Bau	Tamuan from Kuala Pilah andJelebu, Jehai and Kensiu from Grink and Baling,Bidayuh from Bau	Tamuan from Kuala Pilah andJelebu, Jehai and Kensiu from Grink and Baling,Bidayuh from Bau	Tamuan from Kuala Pilah andJelebu, Jehai and Kensiu from Grink and Baling,Bidayuh from Bau	Tamuan from Kuala Pilah andJelebu, Jehai and Kensiu from Grink and Baling,Bidayuh from Bau 0.68% for tamuan; 10% for Jehai, 24% for Kensiu and 0.067 for Bidayuh	Tamuan from Kuala Pilah andJelebu, Jehai and Kensiu from Grink and Baling,Bidayuh from Bau	Nataional representative	Nataional representative	randomly selected 33/509 public school in rural and 37/172 in urban	randomly selected 33/509 public school in rural and 37/172 in urban	randomly selected 33/509 public school in rural and 37/172 in urban	Multistage sampling, ten secondary schools were relected to represent schools of urban and semiurban setting, second grade (11-13) were randomly chosen	Presentative of entire province Binh Thuan in Vietnam	multistage cluster sampling	multistage cluster sampling	national representative survey. Health Morbidity Survey (NHMS III)	representative sample using two state cluster sampling	representative sample using two state cluster sampling	Three nationally presentative survey of adults: Vietnam Living Standrad Survey (1992-1993 and 1997-1998: Vietnam National health seuvey 2001-2)	Sampling frame included all adults >=40 in 12 mainland districts of Timor	Sampling frame included all adults >=40 in 12 mainland districts of Timor	poulation based stratified two stage cluster sampling	two stage random samplling to represent preschoold children in Saraburi province	Multi stage sampling method	stratified two stage cluster sampling; propotionate-to-size sampling
Respons Rate (overall and between comparison group	5,350/7909 (68%)	5,350/7909 (68%)	5,350/7909 (68%)	5,350/7909 (68%)	19,256/21,960=87.7%	19,256/21,960=87.7%	2004=93%, 1997= 79%	2004=93%, 1997= 79%	2004=93%, 1997= 79%	2004=93%, 1997= 79%	2004=93%, 1997= 79%	2004=93%, 1997= 79%	0.71	not clearly stated	not clearly stated	not clearly stated	87,134/over 200,000 (44%), urban vs rural 51.8 vs 31.1: urban is over represented	0.95	0.95	0.95	0.95	0.99	household or subjects not able to present at survey were replaced	not clearly stated	not clearly stated	not clearly stated	not clearly stated	not clearly stated	not clearly stated	not clearly stated	not clearly stated	not clearly stated	not clearly stated	not clearly stated	not clearly stated	0.94	0.976	0.945	0.945	not clearly stated	0.95	0.95	not clearly stated	0.895	0.895	0.858	0.838	0.8	94.7
Risk of selection bias	low risk	low risk	low risk	low risk	low risk	low risk	low risk	low risk	low risk	low risk	low risk	low risk	low risk	unclear risk	unclear risk	unclear risk	unclear risk	low risk	low risk	low risk	low risk	low risk	low risk	unclear risk	unclear risk	unclear risk	unclear risk	unclear risk	unclear risk	unclear risk	unclear risk	unclear risk	unclear risk	unclear risk	unclear risk	low risk	low risk	low risk	low risk	unclear risk	low risk	low risk	unclear risk	low risk	low risk	low risk	low risk	low risk	low risk
definition of urban	Urban political district (mulnicipality)	Urban political district (mulnicipality)	Urban political district (mulnicipality)	Urban political district (mulnicipality)	Urban according to Thai Naitonal Health Examination Survey (NHES IV)	Urban according to Thai Naitonal Health Examination Survey (NHES IV)	Urban according to Thai Naitonal Health Examination Survey (NHES III and NHES II)	Urban according to Thai Naitonal Health Examination Survey (NHES III and NHES II)	Urban according to Thai Naitonal Health Examination Survey (NHES III and NHES II)	Urban according to Thai Naitonal Health Examination Survey (NHES III and NHES II)	Urban according to Thai Naitonal Health Examination Survey (NHES III and NHES II)	Urban according to Thai Naitonal Health Examination Survey (NHES III and NHES II)	not clearly stated	not clearly stated	not clearly stated	not clearly stated	Self report Urban Location of residence at 10-12 and in 2005 (U-U)	urbanicity scale 0-100: made up of 7 components	urbanicity scale 0-100: made up of 7 components:	urbanicity scale 0-100: made up of 7 components	urbanicity scale 0-100: made up of 7 components:	Urban classification to reflect economic and land use pattern in the province	Urban using National Population and Housing census in 1999	Urban area was Ben Thanh ward (district 1)	Temuan and Bidayud populations represent semi-urban communitites	Temuan and Bidayud populations represent semi-urban communitites	Temuan and Bidayud populations represent semi-urban communitites	Temuan and Bidayud populations represent semi-urban communitites	Temuan and Bidayud populations represent semi-urban communitites	Temuan and Bidayud populations represent semi-urban communitites	not clearly stated	not clearly stated	City of Yogyakarta. Urban subdivieded to urban poor (from urban slum area)	City of Yogyakarta. Urban subdivieded to urban poor (from urban slum area)	City of Yogyakarta. Urban subdivieded to urban poor (from urban slum area)	children going to schools in urban setting in Vientiane	communities slected based on socioeconomic characteristics and ecological conditions in Binh Thuan Province	Urban as determine by government official-the heads of each local Commune Health Clinic	Urban as determine by government official-the heads of each local Commune Health Clinic	According to National Health Morbidity Survey (NHMS III	Urban according to Purwejo Demographic Surveillance System	Urban according to Purwejo Demographic Surveillance System	All three survey use urban defitnition according to national census	urban based on national census data	urban based on national census data	urban according to Statistics Department of Malaysia	Districts in Saraburi municipality	Urban part of City of Depok (25% engaged in agricultural activities	Urban according to calssfication by Department of Statistics, Malaysia
comparison group	Rural political district	Rural political district	Rural political district	Rural political district	Rural according to Thai Naitonal Health Examination Survey (NHES IV)	Rural according to Thai Naitonal Health Examination Survey (NHES IV)	rural according to Thai Naitonal Health Examination Survey (NHES III and NHES II)	rural according to Thai Naitonal Health Examination Survey (NHES III and NHES II)	rural according to Thai Naitonal Health Examination Survey (NHES III and NHES II)	rural according to Thai Naitonal Health Examination Survey (NHES III and NHES II)	rural according to Thai Naitonal Health Examination Survey (NHES III and NHES II)	rural according to Thai Naitonal Health Examination Survey (NHES III and NHES II)	not clearly stated	not clearly stated	not clearly stated	not clearly stated	self report rural location of residence at 10-12 and in 2005 (R-R)	1. population size, 2. poulation density,3. communications, 4 transportaion, 5. markets, 6 educational facilities and 7. health services	1. population size, 2. poulation density,3. communications, 4 transportaion, 5. markets, 6 educational facilities and 7. health services	1. population size, 2. poulation density,3. communications, 4 transportaion, 5. markets, 6 educational facilities and 7. health services	1. population size, 2. poulation density,3. communications, 4 transportaion, 5. markets, 6 educational facilities and 7. health services	communities classified as rice growing, plantation, upland and mixed economy strata	Rural using Naitonal Population and Housing census in 1999	Sub urban area was Phuthuan village (Nha be District); rural area was Tam Thon Hiep (Can Gio District)	Kensiu and Jehai communities were from rural area	Kensiu and Jehai communities were from rural area	Kensiu and Jehai communities were from rural area	Kensiu and Jehai communities were from rural area	Kensiu and Jehai communities were from rural area	Kensiu and Jehai communities were from rural area	not clearly stated	not clearly stated	city of Kidul, about 20 to 40 kms from Yogyakarta	city of Kidul, about 20 to 40 kms from Yogyakarta	city of Kidul, about 20 to 40 kms from Yogyakarta	children going to schools in semi urban setting	communities slected based on socioeconomic characteristics and ecological conditions in Binh Thuan province	rural and mixed urban/rural communes were defined as those that contain rural areas covering 30% to 50% of their geographic boundary	rural and mixed urban/rural communes were defined as those that contain rural areas covering 30% to 50% of their geographic boundary	According to National Health Morbidtiy Survey (NHMS III)	rural area subsclassified according to an asset survey in 1999 and classifed in to quintiles	rural area subsclassified according to an asset survey in 1999 and classifed in to quintiles	All three survey use ruraldefitnition according to national census	rural based on national census data	rural based on national census data	rural according to Statistics Department of Malaysia	13 districts outside saraburi municipality	Rural part of city of depok (the majority of household engaged in agricultural activity)	Urban according to calssfication by Department of Statistics, Malaysia
Risk of information bias for exposure	low risk	low risk	low risk	low risk	low risk	low risk	low risk	low risk	low risk	low risk	low risk	low risk	unclear risk, non differential	unclear risk, non differential	unclear risk, non differential	unclear risk, non differential	Unclear risk, on differential	low risk	low risk	low risk	low risk	low risk	low risk	low risk	low risk	low risk	low risk	low risk	low risk	low risk	unclear risk	unclear risk	low risk	low risk	low risk	low risk	low risk	low risk	low risk	low risk	low risk	low risk	low risk	low risk	low risk	low risk	low risk	low risk	low risk
obesity defenition	WC≥90 in men	WC≥80 in women	BMI≥30	BMI≥30	Abdominial obesity WC>90 in men	Abdominial obesity WC>80 in women	Abdominial obesity WC>90 in men	25≤BMI<30	BMI≥30	Abdominial obesity WC>80 in women	25≤BMI<30	BMI≥30	BMI above 95th percentile for age and sex	BMI≥30	BMI≥30	BMI≥30	BMI≥25	BMI≥25	WC>85 in men	BMI≥25	WC>80 in women	BMI above 95th percentile for age	BMI≥25	BMI≥25	obese I(BMI 25-29)	Obese II (BMI>30)	obese I(BMI 25-29)	Obese II (BMI>30)	obese I(BMI 25-29)	Obese II (BMI>30)	BMI≥23	BMI≥23	Weight for Height (WHZ)base on WHO> 2.0	Percentiles passing BMI of 25 by International Obesity Task force (IOTF)	Percentiles passing BMI of 30 by International Obesity Task force (IOTF)	Percentiles passing BMI of 25 by International Obesity Task force (IOTF)	BMI above 85th percentile (WHO,2000)	BMI≥25	BMI≥23	WC ≥ 90 in males, WC ≥ 80 in females	BMI ≥ 25	BMI ≥ 25	BMI ≥ 25	BMI ≥ 25	BMI ≥ 30	BMI ≥ 30	Weight for Height indes >97 of the Thai national standards. The standards were developed seperately for boys and girls	BMI ≥ 25	Percentiles passing BMI of 25 by International Obesity Task force (IOTF)
measurement of obesity	WC at horizontal plane 1 cm above nave by trained staff	WC at horizontal plane 1 cm above nave by trained staff	Measurement of weight and height by trained staff	Measurement of weight and height by trained staff	WC between lower rib margin and iliac crest	WC between lower rib margin and iliac crest	WC between lower rib margin and iliac crest	Weight and height measured by trained technicians using standardized procedues and equipment	Weight and height measured by trained technicians using standardized procedues and equipment	WC between lower rib margin and iliac crest	Weight and height measured by trained technicians using standardized procedues and equipment	Weight and height measured by trained technicians using standardized procedues and equipment	Examination(weight and height) done by doctors	height taken by trained personnel, digital weight scale	height taken by trained personnel, digital weight scale	height taken by trained personnel, digital weight scale	self report weight and height with small validation study	Trained staff, weight measured using mechanical scale, height using folding stadiometer	trained staff measured at midpoint between bottom of ribs and top of the iliac creast	Trained staff, weight measured using mechanical scale, height using folding stadiometer	trained staff measured at midpoint between bottom of ribs and top of the iliac creast	weight and height measured using trained interviewers	Height using wooden stadiometer, weight using electronic scale	subjected measured and weight in light clothing	form of measurement not clearly stated	form of measurement not clearly stated	form of measurement not clearly stated	form of measurement not clearly stated	form of measurement not clearly stated	form of measurement not clearly stated	not clearly stated	not clearly stated	Trained personnel, weight by digital scalre, height with portable stadiometer	Trained personnel, weight by digital scalre, height with portable stadiometer	Trained personnel, weight by digital scalre, height with portable stadiometer	Measurement of height and weight	height and weight measures using standard mechanical scales and gauage	Weight measure using OMRON, height measurd using measuring tape	Weight measure using OMRON, height measurd using measuring tape	Trained research team. Mid point between lower rib margin and iliac creast, taken an end of normal exhalation	Trained field staff. Weight measured using electronic scale, height using standiometer	Trained field staff. Weight measured using electronic scale, height using standiometer	not clearly stated	height using portable stadiometer, weight using portable scale	height using portable stadiometer, weight using portable scale	weight using digital scale, height using body meter. By trained interviewers	height and weight using a tape meaured (fixed onto a pillar) and tanita digitlal scale	data collected by researcher and trinaed nutritionist. Weight using electronic weight scale and height by microtoise tape	Height measure with portabble scale, weight with scale calibrated before each session
Risk of information bias for outcome	low risk	low risk	low risk	low risk	low risk	low risk	low risk	low risk	low risk	low risk	low risk	low risk	low risk	low risk	low risk	low risk	low risk	low risk	low risk	low risk	low risk	low risk	low risk	low risk	unclear risk	unclear risk	unclear risk	low risk	low risk	low risk	unclear risk	unclear risk	low risk	low risk	low risk	low risk	low risk	low risk	low risk	low risk	low risk	low risk	unclear risk	low risk	low risk	low risk	low risk	low risk	low risk
confounding factors controlled for	age and gender	age and gender	age gender	age gender	gender, ethnicity, education, household income,martital status	age, gender	age, gender, geographic region,smoking and marital	age, gender, geographic region,smoking and marital	age, gender, geographic region,smoking and marital	age, gender, geographic region,smoking and marital	age, gender, geographic region,smoking and marital	age, gender, geographic region,smoking and marital	not clearly stated, but age restricted and obesity already classified by age and gender	not stated	gender, not age	gender, not age	age, gender, income ,education, marital status, ethinicity, region	gender restricted, age restricted, assets, income, education and marital status	gender restricted, age restricted, assets, income, education and marital status	gender restricted, age restricted, assets, income, education and marital status	gender restricted, age restricted, assets, income, education and marital status	age, household wealth, maternal education household head occupation, gender, maternal BMI, household size and ethinicity	age group, gender, education level and food expendeture	none	age	age	age adjusted, gender restricted	age adjusted, gender restricted	age adjusted, gender restricted	age adjusted, gender restricted	gender restricted analysis	gender restricted analysis, age and marital status	age restricted range, gender specific criteria	age restricted range, gender specific criteria	age restricted range, gender specific criteria	age restricted range, gender specific criteria	age restricted range, gender specific criteria	unclear	unclear	gender specific criteria	gender restricted analysis, age	gender restricted analysis, age	age, gender, education, current occupation, food expenditure	age, gender, literacy and household income	age, gender, literacy and household income	age ,gender, ethinicity, current smoking	age restricted poulation and gender specific criteria	none	Age and gender specific criteria
Risk of confounding	low risk	low risk	low risk	low risk	low risk	low risk	low risk	low risk	low risk	low risk	low risk	low risk	low risk	high risk	unclear risk	unclear risk	low risk	low risk	low risk	low risk	low risk	low risk	low risk	high risk	unclear risk	unclear risk	low risk	low risk	low risk	low risk	unclear risk	low risk	low risk	low risk	low risk	low risk	low risk	unclear risk	unclear risk	unclear risk, age not adjusted for	low risk	low risk	low risk	low risk	low risk	low risk	low risk	high risk	low risk
sample size	2093	3212	2093	3212	9153	10103	2004 N=9079: 1997 N=1107	2004 N=9079: 1997 N=1107	2004 N=9079: 1997 N=1107	2004 N=10,054; 1997 N=2002	2005 N=10,054; 1997 N=2002	2006 N=10,054; 1997 N=2002	1405	6766	3331	3435	87134	987	988	819	819	4610	14,542 for 2000; 17,213 for 2005	300	Bidyuh (102), Temuan(63), Jehai(63), kensiu(38): Total (266)	Bidyuh (102), Temuan(63), Jehai(63), kensiu(38): Total (266)	Bidyuh(38), temuan(20);jehai(33) kensiu(15); Total (106)	Bidyuh(38), temuan(20);jehai(33) kensiu(15); Total (106)	Bidyuh(64), temuan(43);jehai(30) kensiu(23); Total (160)	Bidyuh(64), temuan(43);jehai(30) kensiu(23); Total (160)	3257	3163	2570	2570	2570	621	2546	1621	1621	4341	1502	1425	n=11981 in 1992; n=15971 in 1997; n=94656 in 2001	2003	2003	16127	1157	180	699
mean age	50.2 (SE=1.3)	50.6 (SE=1.2)	50.2 (SE=1.3)	50.6 (SE=1.2)	20-39=20.8%; 40-59=30.0%;60-79= 44.4%; ≥80=4.8	20-39=20.5%; 40-59=32.9%;60-79= 41.7%; ≥80=4.9	no clearly reported	no clearly reported	no clearly reported	no clearly reported	no clearly reported	not clearly reported	9.68 (sd=0.46)	not clearly stated	not clearly stated	not clearly stated	median 29	21.5 (sd=0.30)	21.5 (sd=0.30)	21.5 (sd=0.31)	21.5 (sd=0.31)	2-4:=33.8%; 5-6=23.9%;7-10=42.3	not clearly stated		20-29=19.5%;30-39=22.9%;40-49=24.4%; 50-59=18.0%; 60-69=11.3%;>70=3.8%	20-29=19.5%;30-39=22.9%;40-49=24.4%; 50-59=18.0%; 60-69=11.3%;>70=3.8%	can not be identify	can not be identify	can not be identify	can not be identify	40.8 sd(16.6)	40.7 SD(17.2)	not clearly stated	not clearly stated	not clearly stated	not clearly stated	7.41	52 (sd 12.5)	52 (sd 12.5)	47.8 SD(14.5)	not clearly stated	not clearly stated	not clearly stated	not clearly stated	not clearly stated	36.7 (CI 36.3 to 37.1)	5.8	46.36	11.1
age range	≥35 to ≥65	≥35 to ≥65	≥35 to ≥65	≥35 to ≥65	20 to ≥80+	29 to ≥80+	18-59	18-59	18-59	18-59	18-59	18-59	9 to 10 years old	18-59	18-59	18-59	15-87	21	21	21	21	2-10 years	25-64	40-59	>20	20 to >70	20 to >70	20 to >70	20 to >70	20 to >70	18-70	18-70	6-7.9 for girls, 6 to 8.9 for boys	6-7.9 for girls, 6 to 8.9 for boys	6-7.9 for girls, 6 to 8.9 for boys	11 to 13 years old	6 to 10 years old	35 to 93	35 to 93	≥18	15-74	15-74	19-51+	40 to >=70	40 to >=70	15 to 93 years	4 to 6	35.3 to 59.6 years	10.6 to 12.2
% female	0	100	0	100	0	100	0	0	0	100	100	100	48.9	50.8	0	100	54.3	0	0	100	100	48.7	51.2 for 2000, 50.7 for 2005	62.3 for total population, 68% for urban; 59% for semiurban and 60% for rural	60.1	60.1	0	0	100	100	100	0	42.3	42.3	42.3	52.8	not clearly stated	56.1	56.1	64.9	0	100	54.7 in 1992; 54.3 in 1997; 53.2 in 2001	48.1	48.1	57.6	not clearly stated	50.5	48.5
N for urban exposure	not clearly reported	not clearly reported	not clearly reported	not clearly reported	4818	5635	2004=4654; 1997=466	2004=4654; 1997=466	2004=4654; 1997=466	2004 N=5474; 1997 N=924	2005 N=5474; 1997 N=924	2006 N=5474; 1997 N=924	1057	3613	1805	1808	17427	n/a	n/a	n/a	n/a	not clearly reported	3,836 in 2000; 4,068 in 2005	101	165	165	58	58	107	107	1822	1778	1352 urban	1352 urban	1352 urban	297	934	not clearly reported	not clearly reported	2218	186	177	2769 in 1992; 4961 in 1997; 33235in 2001	280	280	not clearly stated	603	90	471
N for comparison group	not clearly reported	not clearly reported	not clearly reported	not clearly reported	4335	4468	2004=4425;1997=705	2004=4425;1997=705	2004=4425;1997=705	2004 N=4580; 1997 N=1078	2005 N=4580; 1997 N=1078	2006 N=4580; 1997 N=1078	316	3153	1526	1627	38342	n/a	n/a	n/a	n/a	not clearly reported	10,616 in 2000, 13,145 in 2005	100 for suburban and 99 for rural	101	101	48	48	53	53	1435	1385	440 urban poor; 1218 rural	440 urban poor; 1218 rural	440 urban poor; 1218 rural	324	1611	not clearly reported	not clearly reported	2123	1316	1248	9212 in 1992; 11010 in 1997; 61421 in 2001	1723	1723	not clearly stated	554	90	228
baseline (total) prevalence	20.8 (SE=2.8)	50.0 (SE=2.7)	4.2 (SE=0.7)	10.6 (0.9)	not clearly reported	not clearly reported	2004 = 15.7 (14.4 to 17.0); 1997 = 14.3 (10.7 to 18.7)	2004 = 18.8 (17.7 to 20.0); 1997 = 15.7 (13.5 to 18.1)	2004= 5.2 (4.5 to 6.0); 1997 = 4.1 (2.9 to 6.0)	2004=36.3 (34.4 to 38.3); 1997= 30.3 (28.5 to 32.2)	2004 =26.5 (25.2 to 27.9); 1997 = 22.7 (21.1 to 24.4)	2004=9.8 (9.0 to 10.5); 1997=8.3 (7.3 to 9.4)	6.3(5.0 to 7.7)	12.15 (11.26 to 13.10)	9.72 (8.54 to 11.06)	14.66 (13.37 to 16.04)		9.4	6.1	7.8	6.5	8.26	3.5 (3.0-4.0) in 2000; 6.6 (4.9-7.4) in 2005	not clearly stated	not clearly stated	not clearly stated	not clearly stated	not clearly stated	not clearly stated	not clearly stated	44.7 (43.0 to 46.4)	35.0 (33.3 to 36.7)	not clearly stated	not clearly stated	not clearly stated	8% (6.3 to 10.8)	2.7 (2.1 to 3.3)	0.16	0.337	57.4 (55.9 to 58.9)%	not clearly stated	not clearly stated	men 1992=1.1%; women 1992=3.0; men 1997=.31%; women 1997=5.5% men 2001=4.4%; women 2001=6.6% (direct age standardization)	9.7 (8.5 to 11.1) (not clearly reported)	1.3 (0.9 to 1.9) (not clearly stated)	not clearly stated	15.4 (13.3 to 17.6)	45.5 (38.1 to 53.1)	21.7 (18.7 to 25.0)
Risk in exposre	31.3 (SE=3.0)	56.0 (SE=1.5)	6.6 (SE=1.1)	12.6 (1.2)	28.6 (SE=1.5)	48.1 (SE=1.2)	2004= 22.7 (21.1 to 24.3); 1997=23.4 (18.2 to 29.5)	2004= 25.1 (23.6 to 26.6); 1997=20.4 (17.2 to 24.1)	2004=7.1 (6.1 to 8.3); 1997=7.1(5.4 to 9.3)	2004 =37.2 (34.8 to 39.7); 1997 =32.0 (29.5 to 34.6)	2004=25.4 (24.1 to 26.7); 1997 =23.9 (22.0 to 26.0)	2004= 12.3 (11.1 to 13.7); 1997 = 9.9 (8.7 to 11.1)	6.5(5.1 to 8.2)	12.01 (10.82 to 13.32)	10.90 (9.20 to 12.87)	13.16 (11.55 to 14.97)	not clearly reported	not clearly reported	not clearly reported	not clearly reported	not clearly reported	not clearly reported	not clearlyreported	17.8 (10.9 to 26.7)	Bidayuh=37.7; Temuan=34.0	Bidayuh=11.0; temuan=26.3	Bidayuh=25.2;temuan=42.2	Bidayuh=7.6; temuan=18.3	Bidayuh=43.3, temuan=30.8	Bidayuh=12.7,temuan=29.4	44.9 (42.6 to 47.2)	38.6 (36.3 to 40.9)	urban 4.1 urban poor 0.5	4.9; urban poor 0.7%	1.8; urban poor 0	12% (8.9 to 16.9)	4.6 (3.3 to 5.9)	not clearly reported	not clearly reported	56.5 (54.4 to 58.6)	13.3 (9.6 to 18.1)	23.7 (19.6–28.4)	4.8%(4.0 to 5.7) in 1992; 9.1% (8.3 to 9.9) in 1997; 9.6% (9.3 to 9.9) in 2001	28.6 (23.3 to 34.2) (not clearly reported	5.7 (3.3 to 9.1) (not clearly stated)	12.0 (11.2 to 12.8) both gender; 14.0 (12.9 to 15.1) In women; 10.0 (8.9 to 11.1) in men	22.7 (19.4 to 26.3)	57.7 (46.9 to 68.1)	20.8 (17.2 to 24.7)
risk in comparison	16.2 (SE=3.2)	47.5 (SE=3.6)	3.1 (SE=0.7)	9.7 (1.2)	15.2 (SE=0.8)	43.4 (SE=1.4)	2004=13.4 (12.0 to 14.9); 1007=10.1 (7.7 to 13.1)	2004=16.8 (15.4 to 18.2); 1997=13.3 (11.4 to 15.5)	2004=4.5 (3.7 to 5.6); 1997=2.8 (1.7 to 4.7)	2004= 36.0 (33.7 to 38.3); 1997= 29.6 (27.2 to 32.2)	2004 = 26.9 (25.2 to 28.6); 1997=22.1 (19.5 to 25.0)	2004 = 8.8 (8.0 to 9.8); 1997= 7.7 (6.5 yo 9.2)	5.4 (3.2 to 7.5)	12.34 (11.08 to 13.73	8.00 (6.59 to 9.69)	16.86 (14.83 to 19.10)	not clearly reported	not clearly reported	not clearly reported	not clearly reported	not clearly reported	not clearly reported	not clearlyreported	13.0 (7.1 to 21.2) in suburban and 6.1 (2.2 to 12.7) for rural	Jehai=13.7; kensiu=13.8	Jehai=0;kensiu=5.1	Jehai=7.1; kensiu=11.8	jehai=0; kensiu=0	Jehai=20.6, Kensiu=15.1	Jehai=0, kensiu-8.3	44.9 (42.3 to 47.5)	30.4 (28.0 to 32.9)	; rural 1.0	1	0.2	5% (2.8 to 7.9)	1.6 (1.0 to 2.2)	not clearly reported	not clearly reported	58.4 (56.2 to 60.5)	10.1 (6.2-16.1) in richest rural;3.1 (2.2–4.3) for middle 3 quintiles; 0.7 (0.2–2.9 for poorest qunitle in rural	19.6 (14.5–26.1) in rural richest quintle; 10.2 (8.3–12.5); 2.6 (1.2–5.8) in poorest	1.2 (1.0 to 1.4) in 1992; 2.3 (2.0 to 2.6); 3.5 (3.4 to 3.6) in 2001	6.7 (5.5 to 7.9) (not clearly reported	0.6 (0.3 to 1.1) (not clearly stated)	11.3 (10.4 to 12.3) both gender; 13.5 (12.3 to 14.8) in women; 9.1 (7.9 to 10.4) in men	7.4 (5.4 to 9.9)	32.9 (22.7 to 42.9)	23.7 (18.3 to 29.7)
risk differences	not clearly reported	not clearly reported	not clearly reported	not clearly reported	not clearly reported	not clearly reported	not clearly reported	not clearly reported	not clearly reported	not clearly reported	not clearly reported	not clearly reported	not clearly reported	not clearly reported	not clearly stated	not clearly stated	not clearly reported	not clearly reported	not clearly reported	not clearly reported	not clearly reported	not clearly reported	not clearly reported	not clearly stated	not clearly stated	not clearly stated	not clearly stated	not clearly stated	not clearly stated	not clearly stated	not clearly stated	not clearly stated	not clearly stated	not clearly stated	not clearly stated	not clearly stated	not clearly stated	not cleary reported	not cleary reported	not clearly reported	not clearly stated	not clearly stated	not clearly stated	not clearly stated	not clearly stated		not clearly stated	not clearly stated	not clearly stated
crude relative risk	not clearly reported	not clearly reported	not clearly reported	not clearly reported	not clearly reported	not clearly reported	not clearly reported	not clearly reported	not clearly reported	not clearly reported	not clearly reported	not clearly reported	not clearly reported	not clearly reported	not clearly stated	not clearly stated	OR=1.61	1.22 (0.99 to 1.51)	1.25 (0.99 to 1.57)	1.20 (0.85 to 1.52)	1.27 (0.95 to 1.69)	2.66 (1.91 to 3.72)	not clearly reported	OR 3.36 (1.20 to 10.78) for rural OR 1.45 (0.63 to 3.43)	not clearly stated	not clearly stated	not clearly stated	not clearly stated	not clearly stated	not clearly stated	1.0 (0.87 to 1.15)	1.43 (1.23 to 1.67)	not clearly stated	not clearly stated	not clearly stated	not clearly stated	not clearly stated	1.41 (1.0 to 2.0) compared to mix urban rual: 2.13 (0.57 to 7.69) to rural	1.28 (0.99 to 1.66) compared to mix urban-rural: 1.92 (1.0 to 3.70) for rural;	not clearly repored	OR 1.35 (0.77 to 2.38) to richest urban; OR 4.35 (2.56 to 7.14) to middle 3 quintiles in rural; 16.67(4.35 to 100.0)	OR 1.13 (0.84 to 1.83) to richest rural; 0R 2.44 (1.75 to 3.33) to middle 3 quintiles; OR 9.09 (4.17 to 20.0)	4.13 (3.18 to 5.39) in 1992; 4.28 (3.64 to 5.02) in 1997; 2.93 (2.77 to 3.11) in 2001	4.3 (2.9 to 6.3)	9.5 (3.5 to 25.8)	1.07 (0.94 to 1.21)	not clearly stated	2.88 (1.50 to 5.54)	not clearly stated
adjusted relative risk	not clearly reported	not clearly reported	not clearly reported	not clearly reported	2.23 (2.01 to 2.48)	1.21 (1.12 to 1.31)	2004 =1.58 (1.40 to1.82); 1997=1.35 (0.83 to 2.22)	2004=1.56 (1.38 to 1.78) 1997 = 1.16 (0.84 1o 1.58)	2004 = 1.47 (1.18to 1.85); 1997=1.30 (0.63 to 2.70)	2004 = 1.10 (0.98 to 1.12); 1997=1.35 (1.14 to 1.64)	2004=1.12 (0.99 to 1.26) 1997= 1.36 (1.04 to 1.78)	2004 = 1.35 (1.12 to 1.61); 1997=1.31 (0.95 to 1.78)	1.23 (0.70 to 2.26)	not clearly reported	not clearly stated	not clearly stated	OR 1.47 (1.38 to 1.55)	1.08 (0.85 to 1.32)	1.06 (0.82 to 1.35)	1.19 (0.93 to 1.51)	1.28 (0.95 to 1.71)	1.73 (1.21 to 2.48)	2.39 (1.70 to 3.19) in 2000; 2.08 (1.60-2.72) in 2005	not clearly stated	not clearly stated	not clearly stated	not clearly stated	not clearly stated	not clearly stated	not clearly stated	not clearly stated	1.3 (1.1 to 1.6)	OR urban poor 0.46 (0.51 to 2.09); OR for urban 4.35 (2.32 to 8.33)	OR urban poor 0.69 (0.12 to 2.57); Urban non poor 5.26 (2.77 to 10.00)	OR uban poor: not calculated; or urban 11.11 (2.56 to 50)	2.65 (1.40 to 5.24)	2.94 (1.66 to 5.56)	not clearly reported	not clearly reported	0.92 (0.82 to 1.04)	not clearly reported	not clearly reported	1.79 (1.64 to 1.95) in 2001	2.9 (1.8 to 4.5)	5.0 (1.7 to 15.7)	1.16 (1.02 to 1.32)	3.68 (2.51 to 5.47)	not clearly stated	0.85 (0.58 to 1.24)
comments	age adjusted prevalence using Thai census in 2000	age adjusted prevalence using Thai census in 2000	age adjusted prevalence using Thai census in 2000	age adjusted prevalence using Thai census in 2000	age adjusted prevalence: direct adjustment using Thai registered population 2008, OR calcuated from STATA	age adjusted prevalence: direct adjustment using Thai registered population 2008, OR calcualted from STATA	Age standardized prevalence to 2004 Thai population	Age standardized prevalence to 2004 Thai population	Age standardized prevalence to 2004 Thai population	Age standardized prevalence to 2004 Thai population	Age standardized prevalence to 2004 Thai population	Age standardized prevalence to 2004 Thai population, gender restricted	95% CI and RR calculated from raw data	pervalence not age standardaized	pervalence not age standardaized	pervalence not age standardaized		Exposre in multicariable regression: Urbanicity (10 points): mean urbanicity scmore in male 40.6; range 8-61	Exposre in multicariable regression: Urbanicity (10 points): mean urbanicity scmore in male 40.6; range 8-61	Exposre in multicariable regression: Urbanicity (10 points): mean urbanicity scmore in female 41.0; range 8-61	Exposre in multicariable regression: Urbanicity (10 points): mean urbanicity scmore in female 41.0; range 8-61			CI interval of prevelalence and crude OR calculated using STATA	age corrected to the 2000 indigenous Malaysian population	age corrected to the 2000 indigenous Malaysian population	age corrected to the 2000 indigenous Malaysian population	age corrected to the 2000 indigenous Malaysian population	age corrected to the 2000 indigenous Malaysian population	age corrected to the 2000 indigenous Malaysian population	prevalence and 95% CI of prev and OR and 95% CI of OR calculated from data in table, not reported by author	aOR and 95%CI of cOR reported by author	data provided for odds ratio of obesity in urban compared to urban poor, recalculate to fine urban poor to rural	data provided for odds ratio of obesity in urban compared to urban poor, recalculate to fine urban poor to rural	data provided for odds ratio of obesity in urban compared to urban poor, recalculate to fine urban poor to rural	Reseach about oral health and sociobehavioral factors, adjusted RR calculated from STATA	Adjusted RR calculated from STATA	sample weights was used to reweight sample back to population, regression modelling using stepwise approach, may be adjusted for age and smoking	sample weights was used to reweight sample back to population, regression modelling using stepwise approach, may be adjusted for age and smoking	crude aRR calculated, but not age adjusted	middle 3 qunitles with most sample size	middle 3 qunitles with most sample size					CI calculated from stata, adjusted RR also from STATA	CI calculated from STATA, and crude OR also from STATA	95% CI of prev calcuated from STATA
[truncated: 43 more columns]
